# Supplementary material for: Enhanced Photocatalytic Activity of Two-Dimensional Polar Monolayer SiTe for Water-Splitting via Strain Engineering
Source: MDPI journal article supplement (doi:10.3390/molecules28072971), 2023-03-27
Supplement: s1 [file s1]

## Supporting Information

### Enhanced photocatalytic performance of Two-dimensional Polar Monolayer SiTe for water splitting via strain engineering

Di Gu <sup>1</sup>, Wen Qin <sup>1</sup>, Sumei Hu <sup>1</sup>, Rong Li <sup>1</sup>, Xingyuan Chen <sup>1,\*</sup>, Xiaoma Tao <sup>2</sup>, Yifang Ouyang <sup>2</sup>  
and Weiling Zhu <sup>1,\*</sup>

<sup>1</sup> Department of Physics, School of Science, Guangdong University of Petrochemical Technology, Maoming 525000, China; gudi@gdupt.edu.cn (D.G.)

<sup>2</sup> School of Physical Science and Technology, Guangxi University, Nanning 530004, China

\* Correspondence : chenxingyuan@gdupt.edu.cn (X.C.); zhuweiling@gdupt.edu.cn (W.Z.)

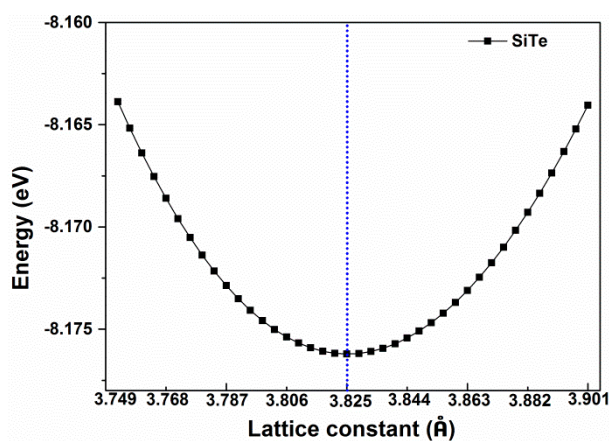

Figure S1. The energy as a function of lattice constant of monolayer SiTe.

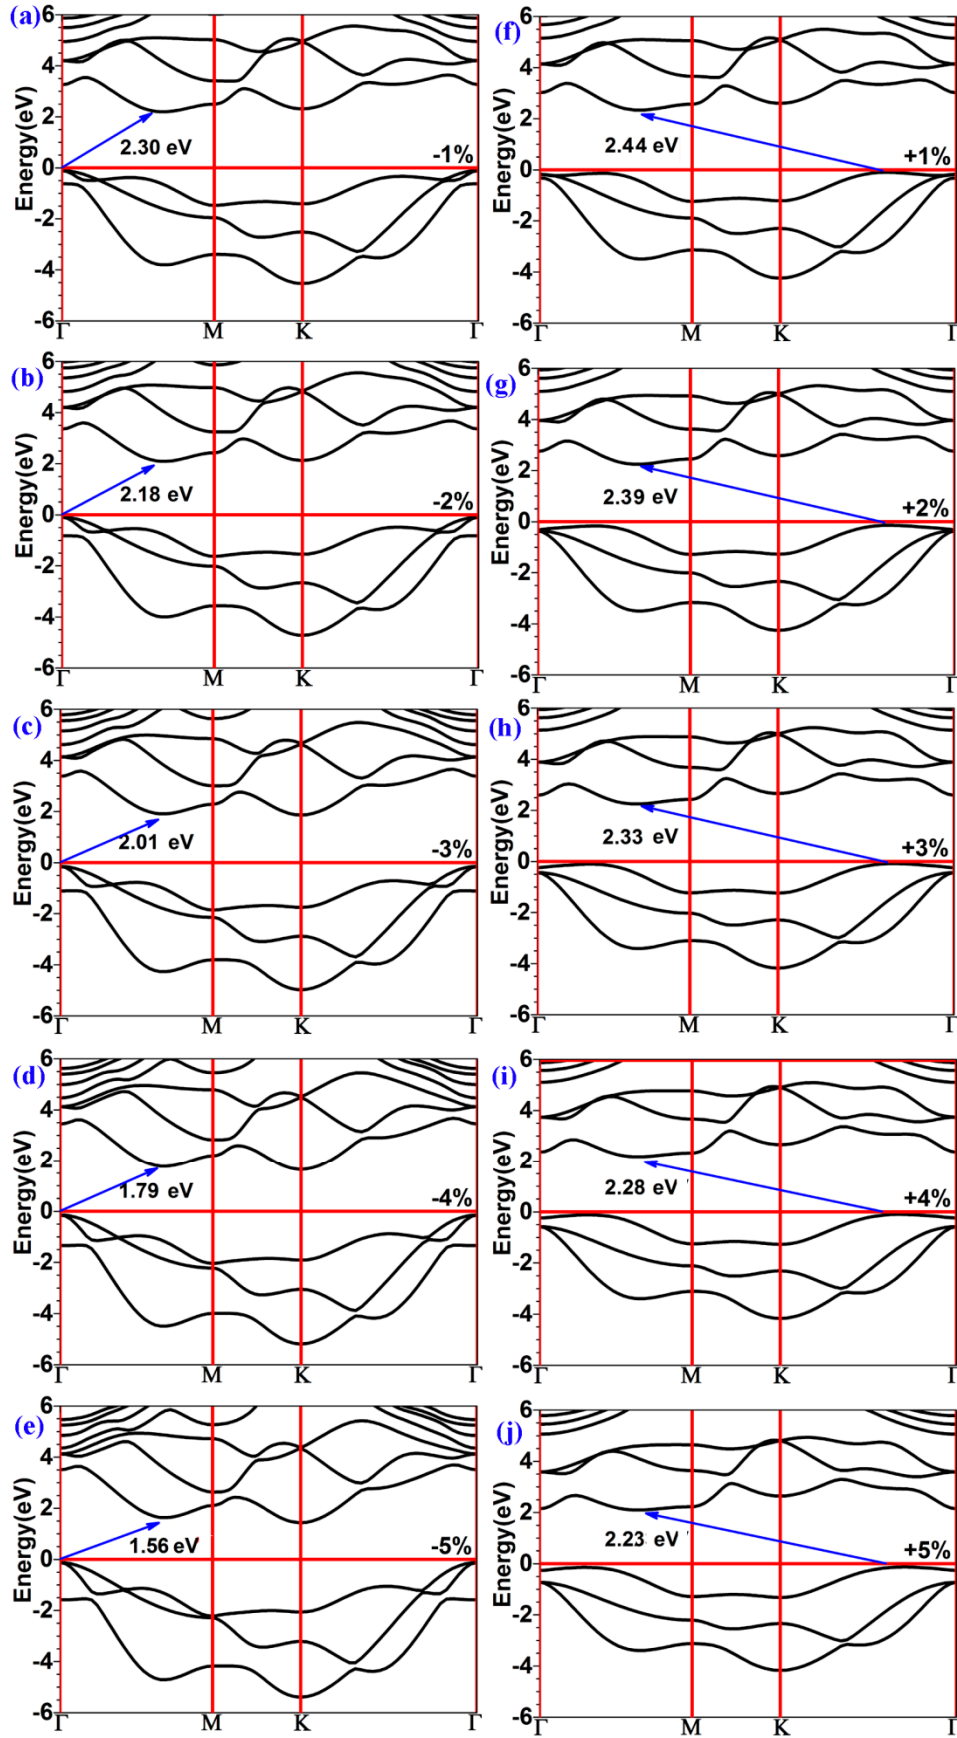

Figure S2. The band structures of monolayer SiTe under strain engineering  
(a) -1%, (b) -2%, (c) -3%, (d) -4%, (e) -5%, (f) +1%, (g) +2%, (h) +3%, (i) +4%, (j) +5%

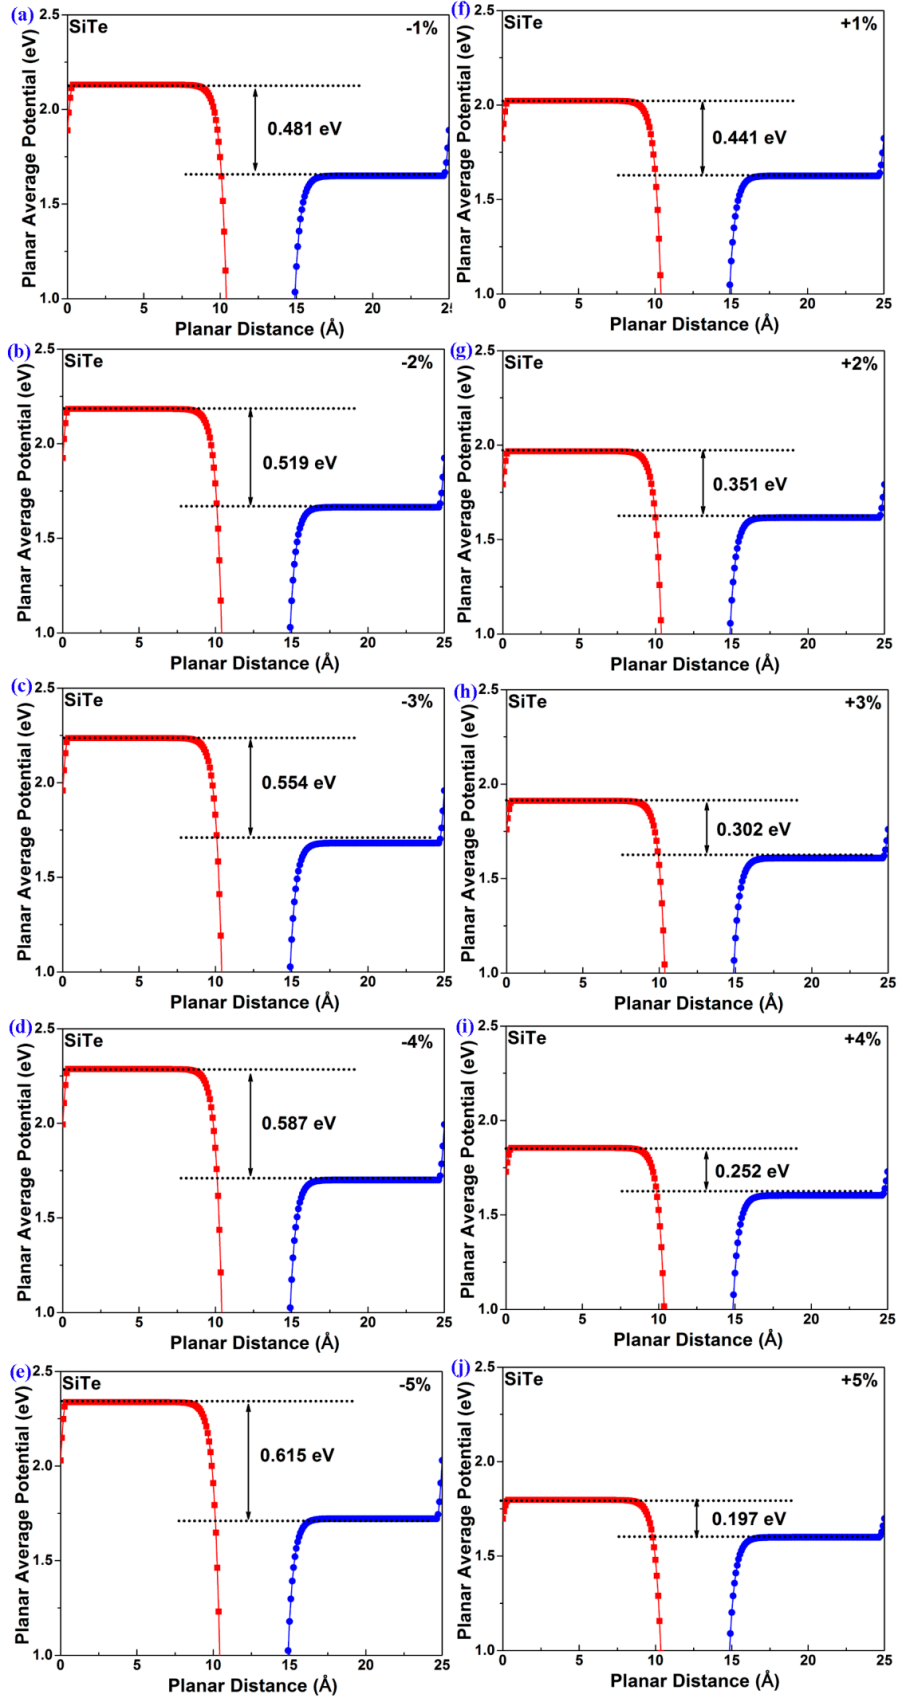

Figure S3. The planar average potential of monolayer SiTe under strain engineering (a) -1%, (b) -2%, (c) -3%, (d) -4%, (e) -5%, (f) +1%, (g) +2%, (h) +3%, (i) +4%, (j) +5%

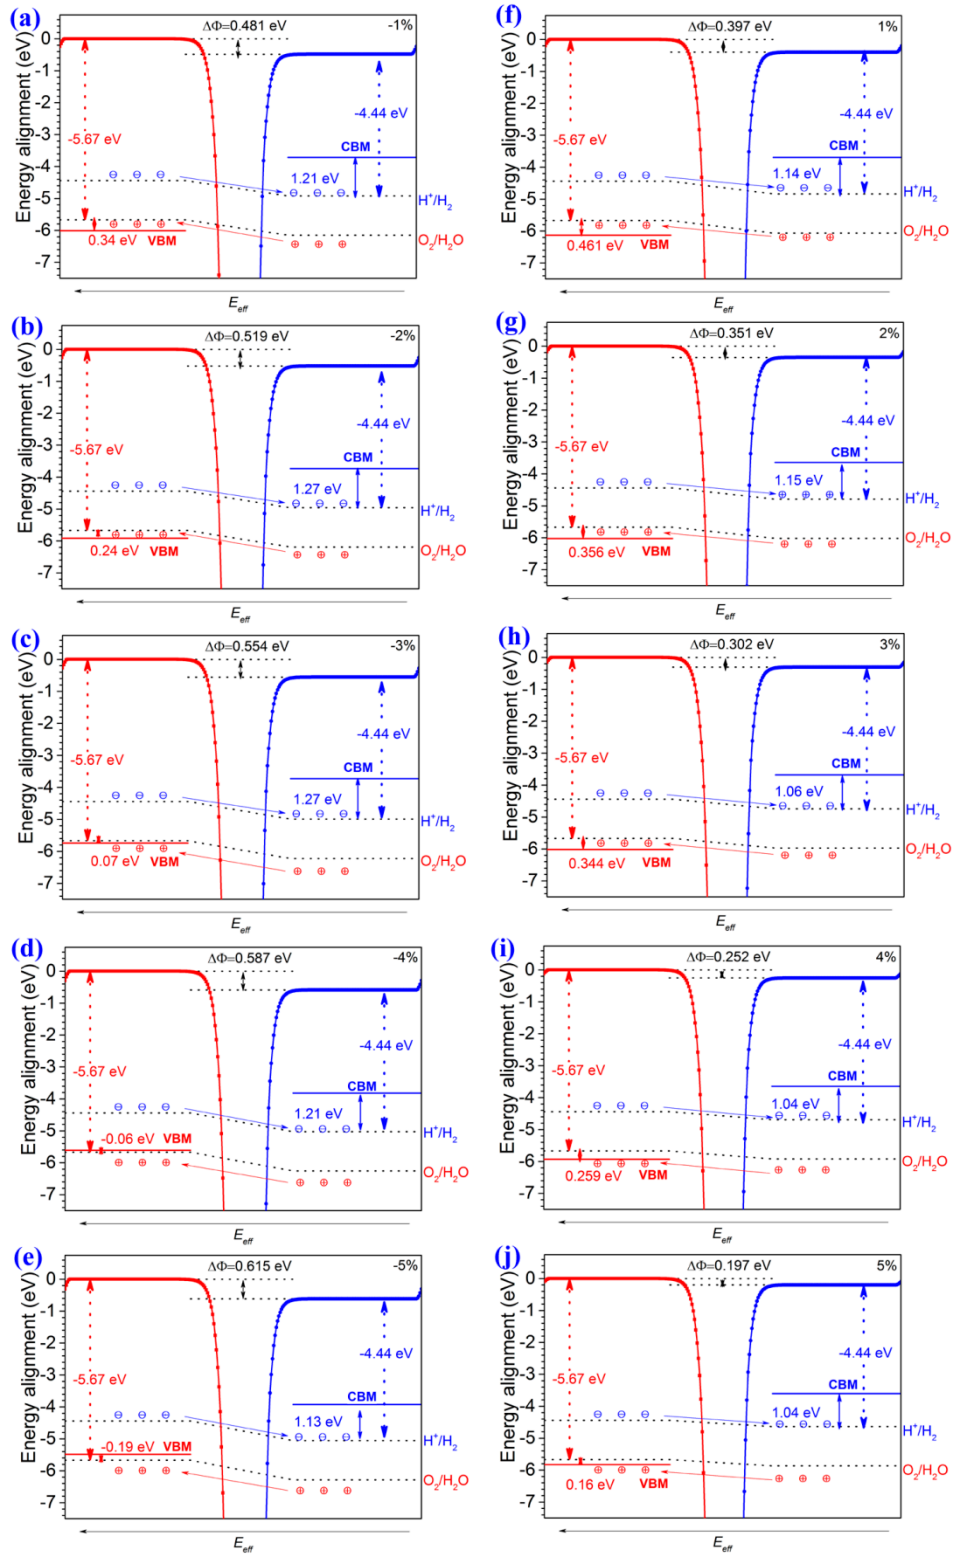

Figure S4. The band alignment of monolayer SiTe under strain engineering  
(a) -1%, (b) -2%, (c) -3%, (d) -4%, (e) -5%, (f) +1%, (g) +2%, (h) +3%, (i) +4%, (j) +5%

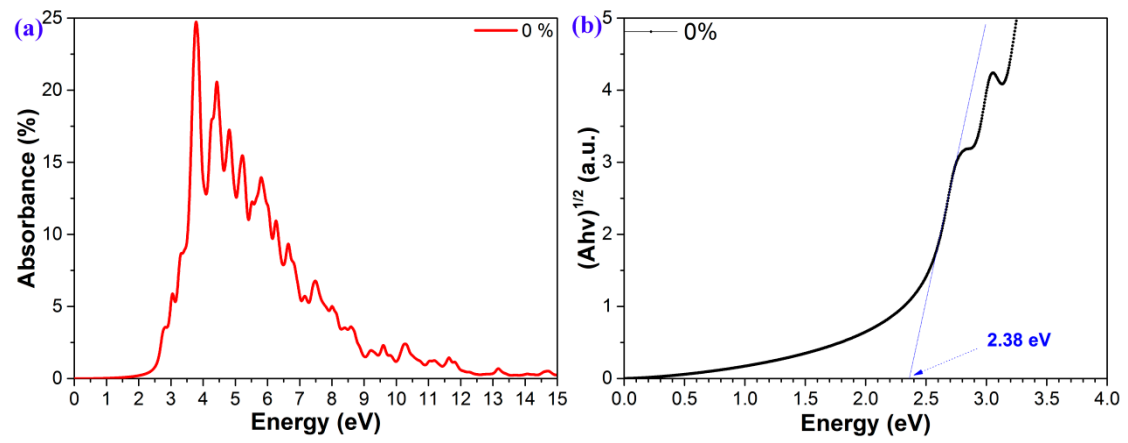

Figure S5. (a) The Absorbance and (b) Absorption edge of 2D polar monolayer SiTe.
